# Supplementary material for: Insects as food and feed: From production to consumption
Source: Atypon-hosted journal article supplement (doi:10.3920/978-90-8686-849-0), 2017-01-01
Supplement: unique_elearning_environment_and_book.pdf [file unique_elearning_environment_and_book.pdf]

## Unique photographs in e-learning environment and book 'Insects as food and feed: from production to consumption'

Edible insects are expected to become an important source of protein for human and animal consumption. The book 'Insects as food and feed: from production to consumption' will pay attention to edible insect production, covering the complete process from rearing to marketing. The book will be enhanced with a unique e-learning environment, showing 360 degrees view photographs of several edible insects.

Both the book and e-learning environment will contain stacked macro photographs of insects discussed in the book. The viewer will be able to look at the insects with a level of detail that is rarely seen. The e-learning environment is a cooperation of [Wageningen Academic Publishers](#), [AgriHolland](#), photographer Hans Smid, and editors Arnold van Huis and Jeffery Tomberlin. The e-learning environment will be funded by the [Uyttenboogaart-Eliassen Stichting](#). The book and e-learning environment will become available in September 2017. For more information, see [www.wageningenacademic.com/iff](http://www.wageningenacademic.com/iff)

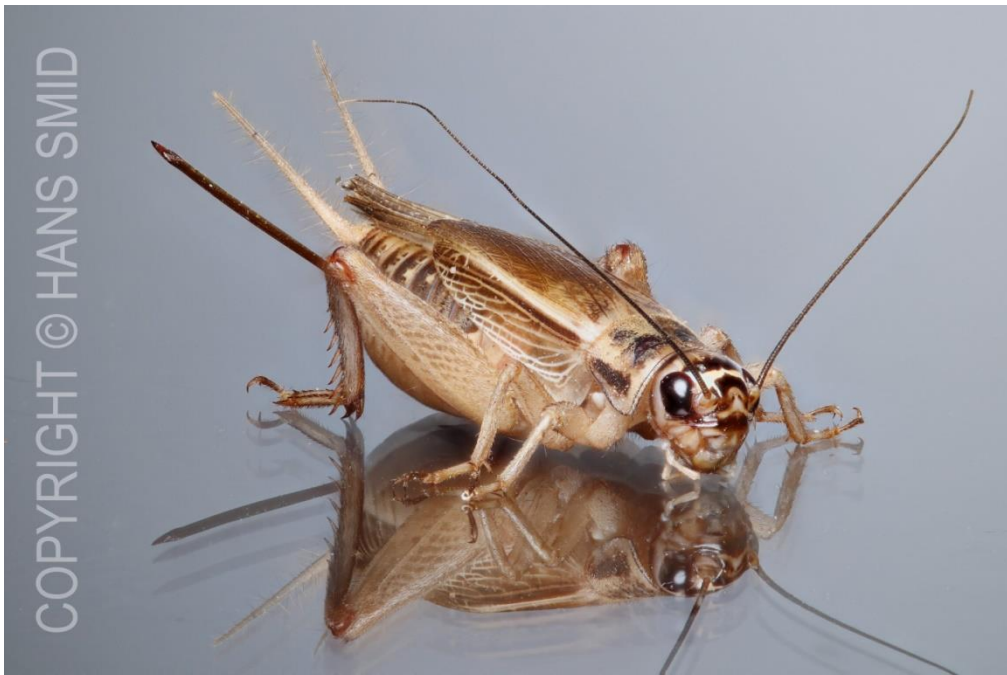

A sample photograph of a house cricket (*Acheta domesticus*), copyright Hans Smid.

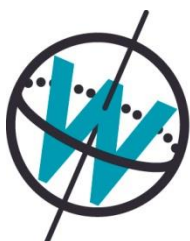

Wageningen Academic  
P u b l i s h e r s

P.O. Box 220  
6700 AE Wageningen  
The Netherlands

[www.wageningenacademic.com](http://www.wageningenacademic.com)
