# Supplementary material for: Insects as food and feed: From production to consumption
Source: Atypon-hosted journal article supplement (doi:10.3920/978-90-8686-849-0), 2017-01-01
Supplement: unique_elearning_environment_and_book.pdf [file unique_elearning_environment_and_book.pdf]

 


**Moving stock and e-content to Brill.com**  
More information

Sign in
 | 
Register
 | 
Institutional Access

|

- Home
- Books
  - Animal and veterinary
  - Food and health
  - Agribusiness and Rural studies
  - Agriculture and environment
  - Book series
  - Backlist paper books
- Journals
  - Beneficial Microbes
  - Comparative Exercise Physiology
  - International Food and Agribusiness Management Review
  - Journal of Applied Animal Nutrition
  - Journal of Insects as Food and Feed
  - Journal of the European Mosquito Control Association
  - World Mycotoxin Journal
- Authors
- Librarians
- Lecturers
  - Textbooks
  - Inspection copy
- Conferences
  - OASES
  - EAAP
  - OASES publications
- News
  - Latest news
  - Newsletter

Search in:

Anywhere

Books

Journal

Advanced search

**Why have you reached this page?**

---

Your browser is not currently configured to accept cookies from the this website. This means that the website will not run as smoothly/quickly as possible and could result in certain functionality on this website not working as designed.

**Recommendation: **Enable cookies on your browser. *Find out more*****

- Job vacancy
- About us
- Contact

- Distributors and representatives
- Terms and conditions
- Shipping and delivery

- Privacy policy
- Help

© Wageningen Academic Publishers 2022

Powered by Atypon® Literatum
